# Supplementary material
Source: publisher figshare collection journal article supplement (https://gsapubs.figshare.com/ndownloader/files/22478192)
Supplement: Supplementary file 1 [file 22478192]

## Sheet: Sheet1
Bond, D.P.G., and Grasby, S.E., 2020, Late Ordovician mass extinction caused by volcanism, warming, and anoxia, not cooling and glaciation: Geology, v. 48, https://doi.org/10.1130/G47377.1
Sample	Latitude	Longitude	Formation	height (m)	13C org		Analyte	Mo	Cu	Pb	Zn	Ag	Ni	Co	Mn	Fe	As	U	Th	Sr	Cd	Sb	Bi	V	Ca	P	La	Cr	Mg	Ba	Ti	Al	Na	K	W	Zr	Sn	Be	Sc	S	Y	Ce	Pr	Nd	Sm	Eu	Gd	Tb	Dy
					per mil		Unit	PPM	PPM	PPM	PPM	PPB	PPM	PPM	PPM	%	PPM	PPM	PPM	PPM	PPM	PPM	PPM	PPM	%	%	PPM	PPM	%	PPM	%	%	%	%	PPM	PPM	PPM	PPM	PPM	%	PPM	PPM	PPM	PPM	PPM	PPM	PPM	PPM	PPM
							LOD	0.05	0.1	0.02	0.2	20	0.1	0.2	1	0.01	0.2	0.1	0.1	1	0.02	0.02	0.04	1	0.01	0.001	0.1	1	0.01	1	0.001	0.01	0.001	0.01	0.1	0.2	0.1	1	0.1	0.04	0.1	0.02	0.1	0.1	0.1	0.1	0.1	0.1	0.1
Dob 1	55°25'47.0"N	03°16'18.1"W	Upper Hartfell Shale	0	-32.75		Rock Pulp	0.44	84.6	3.85	92.2	<20	113.8	17.9	808	4.55	1.4	1.6	6.2	47	0.02	0.35	0.42	152	0.34	0.042	11.2	172	1.89	400	0.491	7.36	0.787	2.75	1.1	133.1	2.7	3	14.9	<0.04	10.9	32.9	4.3	15.4	3.7	0.8	3.3	0.6	3.2
Dob 2	55°25'47.0"N	03°16'18.1"W	Upper Hartfell Shale	0.5	-32.9		Rock Pulp	0.08	74.9	4.58	105.4	<20	124.2	20.8	608	5.67	1.1	1.3	4.1	37	<0.02	0.26	0.36	130	0.16	0.049	6.2	164	1.79	326	0.472	7.03	0.753	2.69	1.3	116.4	2.4	3	13.8	<0.04	7.3	17.94	2.3	9.4	2.2	0.6	2.1	0.3	2.3
Dob 3	55°25'47.0"N	03°16'18.1"W	Upper Hartfell Shale	1	-30.12		Rock Pulp	0.36	115.6	20.92	118.7	<20	125.7	52.2	755	7.04	17.6	1.6	5.5	41	<0.02	0.99	1.24	119	0.17	0.064	9.3	190	1.91	314	0.468	7.32	0.821	2.62	1.3	116.5	2.2	2	14.2	1.03	10.6	26.89	3.6	14.7	4.1	0.9	3.9	0.6	3.6
Dob 4	55°25'47.0"N	03°16'18.1"W	Upper Hartfell Shale	1.5	-30.81		Rock Pulp	0.12	79.6	3.29	107.5	<20	124.4	20	801	5.37	1	1.7	8.5	77	<0.02	0.34	0.27	148	0.5	0.035	13.7	169	1.83	387	0.47	7.69	0.835	3.27	1.2	112.4	2.5	3	15.7	<0.04	10.3	36.36	4.3	15.6	3.5	0.8	2.8	0.5	3.1
Dob 5	55°25'47.0"N	03°16'18.1"W	Upper Hartfell Shale	2	-29.22		Rock Pulp	0.18	72.4	7.35	99	<20	127.1	21.2	1454	5.02	2.7	1.8	7.1	62	<0.02	0.58	0.57	112	0.76	0.032	16.7	166	2.03	383	0.435	7.46	0.813	2.62	1.2	112.6	2.2	2	14.8	0.28	11.9	44.49	4.9	18.3	4.1	0.8	3.1	0.5	3.1
Dob 6	55°25'47.0"N	03°16'18.1"W	Upper Hartfell Shale	2.5	-29.63		Rock Pulp	0.13	192.4	6.66	91.3	<20	125.4	26	949	4.41	1.3	1.5	5.9	46	0.08	0.72	0.44	127	0.41	0.034	12.7	193	1.96	381	0.434	7.36	0.831	2.86	1.6	105.2	2.3	2	14.3	<0.04	9.7	35.37	4.1	15.8	3.4	0.7	3	0.4	2.5
Dob 7	55°25'47.0"N	03°16'18.1"W	Upper Hartfell Shale	3	-29.76		Rock Pulp	0.15	344.7	10.99	93.5	<20	118.6	28.8	423	4.57	0.5	1.5	4.7	41	<0.02	0.49	0.61	143	0.12	0.037	9.5	174	1.76	351	0.426	7.14	0.853	2.58	1.6	100.7	2.2	3	14.4	<0.04	7.7	26.38	3	12.2	2.6	0.5	2.3	0.3	2.3
Dob 8	55°25'47.0"N	03°16'18.1"W	Upper Hartfell Shale	3.5	-28.74		Rock Pulp	0.17	46.7	10.99	91.7	<20	128.2	21.9	1887	5.42	1.3	1.4	6.4	54	<0.02	0.31	0.36	108	0.86	0.037	16.2	153	1.85	379	0.413	7.33	0.721	2.6	1.7	97.1	2.3	2	14.6	<0.04	12.5	43.04	5	18.1	3.9	0.9	3.3	0.5	2.7
Dob 9	55°25'47.0"N	03°16'18.1"W	Upper Hartfell Shale	4	-28.34		Rock Pulp	0.19	35.2	10.08	95.7	<20	134.5	26.4	1852	5.52	1.6	1.4	6	53	<0.02	0.35	0.39	102	0.83	0.045	16.5	151	1.85	381	0.425	7.17	0.767	2.5	1.4	104.9	2.1	3	14.7	<0.04	13	42.64	4.8	18.1	3.9	0.8	3.2	0.5	3.3
Dob 10	55°25'47.0"N	03°16'18.1"W	Upper Hartfell Shale	4.5	-28.33		Rock Pulp	0.11	30.6	6.4	102.2	<20	126.6	27.7	2001	5.53	1	1.5	6.8	67	<0.02	0.3	0.37	104	0.91	0.039	17.4	150	1.92	380	0.418	7.4	0.772	2.87	1.4	100.3	2.1	2	15.1	<0.04	13.1	45.12	5	18.6	3.7	0.9	3.8	0.5	3.1
Dob 11	55°25'47.0"N	03°16'18.1"W	Upper Hartfell Shale	5	-27.18		Rock Pulp	0.65	16.1	8.81	30.7	40	16.2	8.4	>10000	1.73	1	16	11.9	977	0.17	0.29	<0.04	242	21.03	0.014	21.3	22	2.08	169	0.135	3.03	0.633	1.02	0.2	117.6	1.1	<1	6.8	<0.04	62.8	66.97	8.7	37.5	11.4	3.7	13.2	2.3	12.4
Dob 12	55°25'47.0"N	03°16'18.1"W	Upper Hartfell Shale	5.5	-28.46		Rock Pulp	0.11	214.4	9.53	101.1	<20	122.4	29.6	1181	5.14	1.3	1.4	6.1	63	<0.02	0.43	0.5	133	0.47	0.034	14.3	146	1.77	358	0.41	6.97	0.771	2.7	1.5	104	2.2	3	14.3	<0.04	10.7	39.84	4.3	17.6	4	0.9	2.9	0.5	2.8
Dob 13	55°25'47.0"N	03°16'18.1"W	Upper Hartfell Shale	6	-28.29		Rock Pulp	0.3	36.1	15.89	87.3	<20	131.7	34.9	1535	5.61	1.2	1.5	6.4	78	<0.02	0.34	0.43	116	0.7	0.032	17.4	146	1.86	388	0.411	7.37	0.834	2.93	1.4	97.3	2.5	2	15.8	<0.04	11.6	47.78	5.3	19.2	4.3	0.9	3.2	0.5	3
Dob 14	55°25'47.0"N	03°16'18.1"W	Upper Hartfell Shale	6.5	-28.22		Rock Pulp	0.17	60.8	13.5	101.8	<20	128.7	33.7	1287	5.19	1.7	1.4	6.7	77	<0.02	0.36	0.39	94	0.55	0.037	18	147	1.76	386	0.417	7.44	0.844	2.97	1.4	100.3	2.3	2	15.3	<0.04	11.7	49.46	5.3	19.7	4	0.9	3.8	0.5	3.2
Dob 15	55°25'47.0"N	03°16'18.1"W	Upper Hartfell Shale	7	-27.91		Rock Pulp	0.13	44.4	23.41	95.1	<20	129.4	42.1	926	5.32	1.5	1.3	5.5	69	<0.02	0.32	0.59	89	0.36	0.032	14	140	1.71	388	0.422	7.3	0.937	2.95	1.1	94.6	1.9	2	15.1	<0.04	9.9	41.46	4.6	16.4	3.5	0.8	3	0.4	2.5
Dob 16	55°25'47.0"N	03°16'18.1"W	Upper Hartfell Shale	7.5	-26.44		Rock Pulp	0.18	46.7	7.63	101.7	<20	135.2	36.5	993	5.46	0.8	1.3	5.1	53	<0.02	0.31	0.35	103	0.21	0.033	10.6	151	1.64	354	0.427	6.8	0.892	2.7	1.3	96.7	2.3	2	15.2	<0.04	9.4	32.55	3.8	15.4	3.5	0.9	3	0.4	2.8
Dob 17	55°25'47.0"N	03°16'18.1"W	Upper Hartfell Shale	8	-27.87		Rock Pulp	1.21	94.9	14.55	90.8	<20	113	45.7	1875	4.12	12	1.8	7.6	73	<0.02	1.44	0.36	127	0.81	0.033	18.6	138	1.86	419	0.43	7.41	0.937	2.72	1.1	114.7	2.2	2	16.5	0.72	12.5	50.06	5.9	21.1	4.4	0.9	3.6	0.5	3.2
Dob 18	55°25'47.0"N	03°16'18.1"W	Upper Hartfell Shale	8.5	-29.2		Rock Pulp	1.58	89.6	58.85	103.3	<20	124.9	27.2	1033	4.65	19.7	1.6	6.2	63	0.04	2.11	0.31	127	0.45	0.033	15.3	140	1.81	420	0.448	7.02	0.934	2.6	1.2	120.9	2.5	2	15.4	0.92	11.2	42.17	5	19.4	4	0.9	3.7	0.5	2.9
Dob 19	55°25'47.0"N	03°16'18.1"W	Upper Hartfell Shale	9	-28.09		Rock Pulp	0.29	181.9	47.58	115	<20	148.8	39.5	1246	5.14	6.1	1.5	7.2	65	<0.02	1.25	0.44	127	0.72	0.038	19.5	145	1.93	391	0.432	7.42	0.874	2.64	1.4	118.5	2.2	3	13.7	0.62	13.9	48.61	5.8	20.9	4.2	1	3.8	0.5	3.1
Dob 20	55°25'47.0"N	03°16'18.1"W	Upper Hartfell Shale	9.5	-30.44		Rock Pulp	0.17	60.6	5.14	95.9	<20	111.8	18.7	998	5.66	1.2	1.3	5.3	50	<0.02	0.36	0.29	116	0.54	0.033	11.9	156	1.82	359	0.439	7.24	0.793	2.62	1.1	106	2.4	2	15.6	<0.04	10.5	33.37	4.2	15.8	3.6	0.8	3.1	0.5	2.8
Dob 21	55°25'47.0"N	03°16'18.1"W	Upper Hartfell Shale	10	-30.98		Rock Pulp	0.13	43.2	7.08	85.5	<20	114	18	903	5.66	1.1	1.4	6.2	60	<0.02	0.31	0.3	106	0.57	0.043	14.6	152	1.82	375	0.447	7.45	0.821	2.82	1.1	108.5	2.2	1	15.6	<0.04	12.6	38.19	4.7	17	3.7	0.8	3.6	0.5	3.3
Dob 22	55°25'47.0"N	03°16'18.1"W	Upper Hartfell Shale	10.5	-29.38		Rock Pulp	0.14	86.7	3.6	78	<20	119.3	18	1426	4.9	0.9	2	8.5	56	<0.02	0.42	0.12	139	0.69	0.035	18	172	1.85	414	0.467	7.94	0.902	2.99	1.1	111.7	2.5	3	15.4	<0.04	12.5	46.95	5.7	20.5	4.4	0.8	3.4	0.5	2.9
Dob 23	55°25'47.0"N	03°16'18.1"W	Upper Hartfell Shale	11	-27.32		Rock Pulp	0.12	46.1	4.86	90.3	<20	122.6	22.2	1672	5.9	1.1	1.8	7.6	59	<0.02	0.31	0.26	122	0.76	0.033	18.1	177	2	400	0.454	7.71	0.792	3.01	1.4	108.5	2.4	2	16.9	<0.04	13.2	45.93	5.5	20.7	4	1	4	0.5	3.6
Dob 24	55°25'47.0"N	03°16'18.1"W	Upper Hartfell Shale	11.5	-30.31		Rock Pulp	0.22	59.1	25.05	89.6	<20	134	28	343	3.95	9	2	5.4	50	0.35	1.16	0.35	132	0.15	0.102	13.5	176	1.62	408	0.454	7.43	0.976	2.8	1.4	106.5	2.5	3	17	<0.04	16	40.05	5.5	23.3	6.6	1.4	6.9	1	5.5
Dob 25	55°25'47.0"N	03°16'18.1"W	Upper Hartfell Shale	12	-29.31		Rock Pulp	0.12	62	5.13	109.9	<20	136.8	22.9	1555	5.89	1.3	1.7	7.8	66	<0.02	0.45	0.24	120	0.66	0.042	17.6	160	1.92	385	0.452	7.62	0.806	2.91	1.4	108.1	2.2	2	16.3	<0.04	14.1	46.09	5.3	21	4.5	0.9	3.5	0.6	3.6
Dob 26	55°25'47.0"N	03°16'18.1"W	Upper Hartfell Shale	12.5	-28.54		Rock Pulp	0.34	23.5	19.13	123.9	<20	131	30.2	2373	5.64	0.8	1.4	7.3	65	0.06	0.54	0.36	95	0.74	0.043	16.8	153	1.88	387	0.429	7.41	0.79	2.67	1.3	109.3	2.5	3	16	<0.04	14.5	45.75	5.3	21.3	4.4	0.9	3.8	0.6	3.6
Dob 27	55°25'47.0"N	03°16'18.1"W	Upper Hartfell Shale	13	-28.37		Rock Pulp	0.17	207.9	3.8	121.6	<20	147.5	31.4	1377	5.05	1	1.6	6.3	54	0.08	0.65	0.3	123	0.34	0.039	12.8	150	1.77	401	0.443	7.43	0.848	3	1.4	103	2.4	3	16.1	<0.04	12.3	37.14	4.8	17.7	4	0.9	3.6	0.5	3.4
Dob 28	55°25'47.0"N	03°16'18.1"W	Upper Hartfell Shale	13.5	-28.18		Rock Pulp	0.31	53.1	10.82	119.4	<20	139.2	34.2	1324	5.41	1.6	1.4	4.3	47	0.11	0.38	0.34	116	0.22	0.037	9.2	155	1.58	345	0.407	6.52	0.835	2.33	1.6	103	2.1	2	13.4	<0.04	8.8	27.37	3.3	14.1	3	0.7	2.7	0.4	2.6
Dob 29	55°25'47.0"N	03°16'18.1"W	Upper Hartfell Shale	14	-28.67		Rock Pulp	0.26	19.5	4.24	127.1	<20	138.1	41.2	1041	5.21	1.3	1.5	6.5	61	<0.02	0.38	0.28	95	0.29	0.03	15	161	1.7	400	0.443	7.48	0.925	2.88	1.3	101	2.3	3	17.1	<0.04	14.5	44.2	5.3	20.7	5.2	1.2	4.5	0.7	4.1
Dob 30	55°25'47.0"N	03°16'18.1"W	Upper Hartfell Shale	14.5	-27.77		Rock Pulp	0.17	17.9	3.54	104	<20	129.6	41.4	1392	5.43	1.2	1.5	5.7	49	0.04	0.38	0.3	112	0.27	0.032	12.2	146	1.7	366	0.429	7.07	0.828	2.81	1.5	103	2.3	3	15.2	<0.04	10.1	34.82	4.2	15.6	3.4	0.7	3.1	0.5	2.9
Dob 63	55°25'47.0"N	03°16'18.1"W	Upper Hartfell Shale	14.7	-31.48		Rock Pulp	15.48	11.8	40.85	15	174	6.3	1.6	59	2.16	36.7	7.3	7.4	42	<0.02	2.02	0.23	107	0.02	0.027	23.1	60	0.75	338	0.334	5.45	0.83	2.43	0.9	118.6	1.7	1	10.3	0.41	13	50.75	5.9	21.6	4.2	0.7	2.3	0.4	2.5
Dob 64	55°25'47.0"N	03°16'18.1"W	Upper Hartfell Shale	14.9	-29.82		Rock Pulp	17.06	71.8	43.37	36.6	154	45.4	13.7	157	4.5	33.7	8	7.3	35	0.04	1.54	0.22	106	0.03	0.024	21.7	67	1.11	36	0.334	5.52	0.679	2.11	0.7	91.6	1.7	2	12.8	3.05	12.5	48.8	6.3	22.1	4.6	0.8	3.3	0.4	2.9
Dob 65	55°25'47.0"N	03°16'18.1"W	Upper Hartfell Shale	15.1	-30.14		Rock Pulp	17.35	63.8	21.37	38.6	169	44.9	11.9	172	4.47	33.1	8.5	7	38	<0.02	1.48	0.22	107	0.04	0.027	21.7	71	1.16	45	0.331	5.59	0.656	1.98	0.8	96.8	1.7	2	12.3	2.77	14.4	50.23	6.4	23.5	4.5	1	3.5	0.5	3.3
Dob 66	55°25'47.0"N	03°16'18.1"W	Upper Hartfell Shale	15.3	-28.61		Rock Pulp	19.98	66.5	23.74	34	171	36.5	10.9	139	3.99	33.9	9.6	7.4	43	0.04	1.61	0.22	108	0.03	0.024	23.9	66	1.09	42	0.342	5.64	0.754	2.21	0.8	109.4	1.8	2	11.1	2.6	15.1	53.58	7.1	25.8	4.5	1	3.7	0.5	3
Dob 67	55°25'47.0"N	03°16'18.1"W	Upper Hartfell Shale	15.6	-31.2		Rock Pulp	17	69.7	26.72	41.3	150	61.6	16.5	166	4.58	35.1	6.5	6.4	35	0.05	1.66	0.2	100	0.04	0.031	20.7	65	1.19	30	0.301	5.21	0.616	1.81	0.7	101	1.7	2	10.5	2.99	13.2	47.46	6.3	23.6	4.3	0.9	3.4	0.5	2.9
Dob 68	55°25'47.0"N	03°16'18.1"W	Upper Hartfell Shale	15.8	-28.27		Rock Pulp	2.19	46.6	19.79	31.1	<20	9.8	2	42	1.54	14.8	15.1	40.2	48	<0.02	0.48	0.32	59	<0.01	0.053	101.7	6	1.28	714	0.653	14.69	0.407	4.31	1.4	595.2	3.6	3	15.9	0.04	102.6	260.22	33.5	126.5	24.8	5.9	19.5	3.1	18.7
Dob 69	55°25'47.0"N	03°16'18.1"W	Upper Hartfell Shale	16	-30.86		Rock Pulp	16.4	60.1	22.65	36.8	126	48.7	11.2	138	3.94	32.2	7.2	7.4	36	0.12	1.88	0.26	93	0.03	0.021	19	69	1.01	35	0.282	4.73	0.558	1.78	0.7	121.2	1.5	1	9.3	2.72	13.6	45.83	5.9	20.2	3.7	0.7	3.6	0.6	2.6
Dob 70	55°25'47.0"N	03°16'18.1"W	Upper Hartfell Shale	16.2	-31.09		Rock Pulp	14.81	59.5	20.91	44.9	145	56.8	15.1	180	4.28	24	6.7	6.3	36	0.11	1.54	0.22	90	0.04	0.023	17.3	57	1.27	39	0.273	4.95	0.523	1.58	0.7	99.9	1.4	2	9.1	2.85	12.4	39.62	5.2	18.6	3.2	0.9	2.8	0.4	2.6
Dob 71	55°25'47.0"N	03°16'18.1"W	Upper Hartfell Shale	16.4	-27.7		Rock Pulp	6.17	51	24.36	25	31	5.9	2.1	63	2.34	20.1	8.8	7.1	69	0.06	1.01	0.33	66	0.02	0.049	10	16	1.25	482	0.735	12.71	0.886	3.9	1.5	464.9	3.3	3	12.2	0.27	14.4	31.9	5	19.9	4.1	1.3	4.1	0.7	4.9
Dob 72	55°25'47.0"N	03°16'18.1"W	Upper Hartfell Shale	16.7	-29.35		Rock Pulp	15.61	12.5	23.95	16.4	101	7.5	1.6	60	1.98	30.4	7.4	6.9	45	<0.02	2.05	0.24	100	0.02	0.018	19.1	67	0.83	315	0.368	5.38	0.689	2.49	0.9	149.4	2.2	2	9.3	0.41	13	42.29	5.2	17.9	3.4	0.7	2.6	0.4	2.5
Dob 31	55°25'47.0"N	03°16'18.1"W	Birkhill Shale	16.9	-33.57		Rock Pulp	10.5	52.9	21.34	19.2	51	5.6	1.6	69	7.21	34.7	9.6	20.7	30	<0.02	1.35	0.69	80	0.01	0.039	5.2	41	1.05	349	0.322	7.4	0.49	2.95	0.5	488.6	4.5	2	8.1	0.37	28.8	14.56	2.1	8.1	2.4	1.1	4	1	6.6
Dob 32	55°25'47.0"N	03°16'18.1"W	Birkhill Shale	17.1	-33.41		Rock Pulp	10.32	45.2	23.38	31.3	145	20.5	6.8	129	3.65	27.2	5	7.2	42	<0.02	1.51	0.23	98	0.05	0.04	19.5	64	1.09	38	0.322	5.12	0.692	1.86	0.8	102.2	1.6	2	10.6	2.03	9.9	42.53	5	17.6	3	0.6	1.8	0.3	2.2
Dob 33	55°25'47.0"N	03°16'18.1"W	Birkhill Shale	17.3	-33.87		Rock Pulp	5.21	34.3	20.77	74.5	<20	10.4	6.2	917	3.91	19.6	12.2	12.4	47	<0.02	0.62	0.39	68	0.18	0.087	12	10	1.66	564	0.804	14.41	0.551	4.58	1.4	639.8	3.6	3	13	0.21	29	39.91	6	23.8	5.8	1.5	5.8	1.2	7.9
Dob 34	55°25'47.0"N	03°16'18.1"W	Birkhill Shale	17.5	-33.49		Rock Pulp	12.23	45.6	23.63	28.3	139	20.4	8.3	128	3.62	37.6	7.8	7.1	42	0.05	2.08	0.22	117	0.02	0.026	20.5	69	1.3	48	0.404	6.29	0.729	2.66	0.8	172.5	2.4	2	11.5	1.98	15.1	49.07	6.1	21.4	4.2	0.8	3.2	0.5	3.3
Dob 35	55°25'47.0"N	03°16'18.1"W	Birkhill Shale	17.7	-33.54		Rock Pulp	9.68	27.9	34.42	13.9	38	6.1	4.9	74	3.91	37.1	12.8	8.7	30	0.12	1.79	0.2	61	<0.01	0.031	9.1	11	1.17	32	0.648	10.68	0.367	4.91	0.8	560.9	3.3	2	10.3	3.69	21	30.13	4.5	17.9	4.5	1.2	4.8	1	6.2
Dob 36 B	55°25'47.0"N	03°16'18.1"W	Birkhill Shale	17.75			Rock Pulp	20.6	74.6	28.02	24	199	23	11.6	89	4.81	76	9	8.8	52	0.09	3.51	0.23	114	0.02	0.024	17.6	69	1.16	22	0.447	6.73	0.943	2.99	1.2	172.4	2.3	2	11	4.21	14.3	45.34	6.1	20.7	3.9	0.8	2.7	0.5	3.1
Dob 37	55°25'47.0"N	03°16'18.1"W	Birkhill Shale	17.95	-33.6		Rock Pulp	13.27	65.6	28.7	38	96	36.5	17.1	110	4.34	40.4	7.2	8.6	44	0.06	2.89	0.21	92	0.02	0.025	18.2	47	1.27	23	0.391	5.79	0.746	2.64	0.9	164.4	2.2	2	10	3.68	12.7	41.45	5	18.7	2.9	0.7	2.5	0.3	2.6
Dob 38	55°25'47.0"N	03°16'18.1"W	Birkhill Shale	18.15	-33.24		Rock Pulp	11.13	16.8	24.78	24.5	126	15.9	4.2	99	2.98	51.3	6.5	6.9	56	0.04	3.38	0.17	125	0.02	0.033	16.1	52	1.27	56	0.458	6.12	0.972	2.56	1.5	192.9	1.9	2	10.2	1.35	12.3	37.03	4.5	15	2.9	0.7	2.3	0.4	2.5
Dob 39 B	55°25'47.0"N	03°16'18.1"W	Birkhill Shale	18.24			Rock Pulp	0.29	30.8	15.57	24.2	<20	1.9	1.5	40	0.81	2.1	7.6	5.4	98	<0.02	0.3	0.16	77	0.04	0.193	6.7	9	1.36	631	0.772	14.66	1.238	4.41	1.6	540.8	2.7	3	12	<0.04	14.4	19.2	2.8	11.8	3	1	2.8	0.6	3.6
Dob 40	55°25'47.0"N	03°16'18.1"W	Birkhill Shale	18.44	-33.1		Rock Pulp	6.13	40.2	28.81	26.6	146	18.6	6.7	101	3.31	37.5	5.3	7.7	41	<0.02	3.56	0.21	119	0.02	0.022	20.7	62	1.3	58	0.368	6.36	0.739	2.61	1.1	190.2	2.2	2	11.1	1.34	11.9	41.97	5	17.5	3.4	0.8	2.5	0.4	2.6
Dob 41 B	55°25'47.0"N	03°16'18.1"W	Birkhill Shale	18.46			Rock Pulp	16.24	50.7	37.15	39.7	270	26.8	11.5	156	4.5	61.7	8.4	7.5	38	0.03	5.2	0.31	142	0.02	0.024	14.4	81	1.53	39	0.413	6.54	0.792	2.63	1.2	121.5	2.4	1	13.2	2.3	9.1	35.61	4.6	15.9	3	0.7	2.1	0.4	2.4
Dob 42	55°25'47.0"N	03°16'18.1"W	Birkhill Shale	18.66	-32.73		Rock Pulp	12.42	90.2	39.37	59.7	264	72.6	22.2	195	5.03	40.9	6.6	6.4	32	0.16	5.03	0.21	138	0.03	0.027	10.9	62	1.86	19	0.32	6.22	0.657	2.34	0.8	152.4	2.3	1	10.8	3.63	10.1	27.9	3.8	13.8	2.6	0.5	2.1	0.3	2.3
Dob 43 B	55°25'47.0"N	03°16'18.1"W	Birkhill Shale	18.68			Rock Pulp	16.79	29.3	27.09	19.9	348	15.9	7.8	71	2.63	50.5	10.6	9.8	45	<0.02	5.7	0.23	121	0.02	0.017	27	51	0.98	54	0.392	6.29	0.842	2.75	0.9	200.6	2.4	2	9.5	1.92	18	63.6	8.6	31.2	5.8	1.2	4.6	0.7	3.6
Dob 44	55°25'47.0"N	03°16'18.1"W	Birkhill Shale	18.88	-32		Rock Pulp	17.16	77.3	21.93	31.5	359	43	20.1	97	4.34	53.2	8.7	7.2	35	0.09	6.56	0.28	162	0.02	0.021	15.7	81	0.94	26	0.398	5.61	0.718	2.54	1.1	158.7	2.6	2	11	3.98	13.7	39.07	5	17.3	3.7	0.7	2.6	0.4	2.7
Dob 45 B	55°25'47.0"N	03°16'18.1"W	Birkhill Shale	19			Rock Pulp	7.52	20.4	32.09	21.8	50	1.9	0.7	61	3.07	103.7	9	3.6	22	0.19	2.42	0.2	61	<0.01	0.033	1.6	7	0.99	378	0.546	8.38	0.25	3.57	0.6	526	2.6	4	8.2	0.64	7.5	5.2	0.8	3.5	0.9	0.3	1.1	0.3	2.5
Dob 46	55°25'47.0"N	03°16'18.1"W	Birkhill Shale	19.02	-32.18		Rock Pulp	24.45	132.6	27.13	55.8	569	122.1	53.8	158	8.75	82.7	9.4	6	29	0.5	7.2	0.25	186	0.03	0.025	11.7	62	1.32	12	0.362	5.46	0.618	2.48	1.1	119.5	1.9	2	11.2	8.83	12	30.2	4.1	13.6	3.1	0.5	2.3	0.4	2.7
Dob 47	55°25'47.0"N	03°16'18.1"W	Birkhill Shale	19.22	-32.52		Rock Pulp	16.84	56.6	38.05	36.6	625	40.8	9.4	109	4	61.8	9.9	8.1	41	0.14	10.55	0.3	203	0.04	0.027	18.7	69	0.99	28	0.407	6.15	0.783	2.75	1.1	166.7	2.4	2	13.5	2.64	17.1	41.42	5.5	19.3	3.6	0.7	2.8	0.5	3.5
Dob 48	55°25'47.0"N	03°16'18.1"W	Birkhill Shale	19.42	-32.22		Rock Pulp	18.01	73.1	30.26	55.4	793	62.7	11.5	208	4.41	56.6	7.9	8	40	0.38	12.55	0.38	346	0.04	0.03	16.1	86	1.35	27	0.455	6.38	0.822	2.8	1	134.5	2.5	2	13.4	2.9	12.9	37.43	4.9	17.9	3.1	0.7	2.3	0.4	2.9
Dob 49 B	55°25'47.0"N	03°16'18.1"W	Birkhill Shale	19.64			Rock Pulp	0.75	19.4	4.39	83.2	22	5.2	5.7	>10000	1.29	1.8	2.4	3.8	451	0.62	0.28	<0.04	42	21.78	0.321	43.6	3	0.9	167	0.293	4.26	0.704	1.01	0.4	106.2	0.5	1	7.8	0.38	57.2	99.57	13.9	60.3	14	4.6	14	1.9	9.2
Dob 50	55°25'47.0"N	03°16'18.1"W	Birkhill Shale	19.84	-31.84		Rock Pulp	9.25	15.1	21.42	25.3	404	17.8	3.1	152	2.12	30.5	7.6	9.4	45	<0.02	6.46	0.39	349	0.02	0.015	21.9	85	1.08	455	0.477	6.93	0.787	3.13	1.2	165.5	2.6	1	14	0.27	12.8	45.32	5.8	19.1	3.6	0.6	2.9	0.4	2.7
Dob 51	55°25'47.0"N	03°16'18.1"W	Birkhill Shale	20.34	-31.51		Rock Pulp	7.65	72	36.24	54.9	746	40.6	8	283	5.15	32.1	7.1	9.4	40	0.17	8.77	0.36	392	0.03	0.029	23.2	92	1.51	27	0.433	7.38	0.744	2.84	1	143.4	2.1	2	15.5	3.03	15.2	48.54	6.6	24.4	3.8	0.7	3.4	0.5	3.2
Dob 52	55°25'47.0"N	03°16'18.1"W	Birkhill Shale	20.84	-31.52		Rock Pulp	5.61	51.6	36.88	44.4	759	49.2	10.1	344	3.89	26.5	6.3	6.5	43	0.09	6.46	0.41	434	0.05	0.036	13.3	105	1.44	92	0.464	7.55	0.735	3.15	1	165.7	2.4	2	14.7	1.55	12.7	30.18	3.9	13.8	2.6	0.6	2.2	0.4	2.9
Dob 53	55°25'47.0"N	03°16'18.1"W	Birkhill Shale	21.34	-31.46		Rock Pulp	0.15	59.6	5.97	97.2	<20	112.8	32.4	1530	4.39	9.1	1.6	3.3	41	0.03	0.82	0.45	113	0.08	0.04	5.8	138	1.77	338	0.428	6.85	0.738	3	1.3	138.5	2.5	3	13.1	<0.04	6.4	16.28	2.2	7.7	1.6	0.4	2.1	0.3	2.2
Dob 54	55°25'47.0"N	03°16'18.1"W	Birkhill Shale	21.84	-31.36		Rock Pulp	0.37	41	11.46	80.9	<20	95.1	30.4	1269	4.92	9.6	2.1	3.9	37	<0.02	1.38	0.28	122	0.05	0.036	7.1	140	1.66	328	0.44	6.88	0.728	2.62	1.6	129.5	2.2	3	13.3	<0.04	6.7	20.12	2.4	9.4	1.8	0.4	1.6	0.3	1.6
Dob 55 B	55°25'47.0"N	03°16'18.1"W	Birkhill Shale	22.04			Rock Pulp	0.76	138.5	22.71	103.8	<20	163.6	72.2	1084	4.25	23.9	2.5	3.6	38	0.12	0.92	0.22	142	0.07	0.04	6.1	140	1.74	349	0.452	6.42	0.784	2.43	1.7	123.2	2.4	4	14.6	<0.04	9.1	17.92	2.3	9.3	2.5	0.5	2.1	0.4	2.5
Dob 56	55°25'47.0"N	03°16'18.1"W	Birkhill Shale	22.44	-31.57		Rock Pulp	3.13	42.3	21.08	54.4	<20	49.2	13	416	3.98	16.8	2.7	2.7	32	<0.02	1.24	0.24	115	0.03	0.037	3.1	124	1.39	309	0.423	6.49	0.739	2.28	1.3	141.5	2.3	3	12.3	<0.04	3.9	8.66	1	3.6	1.1	0.2	1.1	0.1	1.3
Dob 57	55°25'47.0"N	03°16'18.1"W	Birkhill Shale	22.94	-31.31		Rock Pulp	4.52	43.8	31.83	59.2	<20	30.3	14.1	195	2.57	31.3	11.1	12.7	38	<0.02	3.65	0.52	92	0.07	0.032	7	48	1.27	425	0.38	12.28	0.519	3.46	0.5	301.8	4	4	8.3	<0.04	10.5	21.39	3	10.5	2.8	0.6	2.9	0.5	3
Dob 58	55°25'47.0"N	03°16'18.1"W	Birkhill Shale	23.44	-31.45		Rock Pulp	1.73	49.7	16.04	93.9	<20	62.9	23.5	798	3.88	7.3	3.3	3.5	41	0.07	0.55	0.27	114	0.06	0.048	9.1	127	1.55	335	0.426	6.98	0.71	2.88	1.5	161.5	2.7	5	12.4	<0.04	6.8	22.79	2.7	9.5	2	0.4	1.6	0.2	1.9
Dob 59	55°25'47.0"N	03°16'18.1"W	Birkhill Shale	23.94	-29.68		Rock Pulp	19.27	40.4	105.07	62.2	63	43.4	8.5	226	3.86	54.6	11.8	7.3	49	0.05	7.9	0.26	179	0.1	0.029	20.9	147	1.13	393	0.44	7.27	0.694	3.13	1.1	135.7	2.4	3	15.4	<0.04	15	43.82	6.6	23.6	4.7	0.9	3.5	0.5	3.3
Dob 60	55°25'47.0"N	03°16'18.1"W	Birkhill Shale	24.44	-30.92		Rock Pulp	1.09	63.9	14.96	84.3	75	72.9	16.7	446	4.12	10.2	4.7	4.1	45	0.06	1.08	0.26	167	0.06	0.042	8.3	148	1.48	465	0.41	7.22	0.73	2.81	1.1	142	2.8	5	13.3	0.05	8	19.46	2.6	9.5	2.4	0.4	1.5	0.3	2
Dob 61	55°25'47.0"N	03°16'18.1"W	Birkhill Shale	24.94	-31.01		Rock Pulp	0.22	22.7	11.66	107.9	<20	140.2	32.9	1475	5.37	1.6	1.5	4.2	51	0.16	0.61	0.24	107	0.06	0.034	7.5	137	1.57	390	0.454	7.73	0.76	3.05	1.3	107.1	2.2	2	15.6	<0.04	6.8	21.24	2.6	10.1	1.9	0.4	1.5	0.2	2.2
Dob 62	55°25'47.0"N	03°16'18.1"W	Birkhill Shale	25.44	-31.01		Rock Pulp	0.6	30.6	9.72	64.6	<20	59.9	13.9	381	3.75	12.4	2.4	3.7	44	<0.02	0.52	0.31	104	0.09	0.041	7.4	91	1.7	344	0.419	7.08	0.62	2.82	2.3	169.8	2.6	3	11.8	<0.04	7.5	17.59	2.2	8	1.6	0.4	1.6	0.3	2.1
[truncated: 25 more columns]
